# Supplementary material for: Targeted Genome Sequencing (TG-Seq) Approaches to Detect Plant Viruses
Source: PubMed Central journal article supplement (PMC8066983; doi:10.3390/v13040583), 2021-03-30
Supplement: viruses-13-00583-s001.pdf [file viruses-13-00583-s001.pdf]

**Supplementary Table S1.** Summary of concentrations in ng/ul RNA templates used for RNA-Seq, cDNA amount used for PCR and mPCR and finally the library template used for TG-Seq.

| Samples          | Virus                  | Host      | RNA Amount in ng/μL (Nanodrop) | cDNA Amount in ng/μL (Qubit™ 4 Fluorometer) | PCR Product ng/μL (Qubit™4 Fluorometer) | Final Library Amount ng/μL (Qubit™ 4 Fluorometer) |
|------------------|------------------------|-----------|--------------------------------|---------------------------------------------|-----------------------------------------|---------------------------------------------------|
| 1 (14C)          | CMV                    | Faba bean | 350                            | 159                                         | 58.2                                    | 17.1                                              |
| 2 (13C)          | PSbMV                  | Field pea | 484                            | 145                                         | 57.6                                    | 18.6                                              |
| 3 (LY-2)         | PEBV                   | Faba bean | 1674                           | 163                                         | 126                                     | 22.1                                              |
| 4                | CMV, PEBV, PSbMV, BYMV | Pool      | 354                            | 168                                         | 42.7                                    | 15.0                                              |
| 5 (LY-2)         | PEBV                   | Faba bean | 1674                           | 163                                         | 47.7                                    | 18.4                                              |
| 6v(14BY)         | BYMV                   | Lentil    | 442                            | 134                                         | 59.5                                    | 15.2                                              |
| 7 (14BY)         | BYMV                   | Lentil    | 442                            | 134                                         | 58                                      | 14.0                                              |
| 8                | CMV, PEBV, PSbMV, BYMV | Pool      | 354                            | 168                                         | 125                                     | 14.4                                              |
| 9 (14BY)         | BYMV                   | Lentil    | 442                            | 134                                         | 46.7                                    | 14.4                                              |
| 10               | CMV, PEBV, PSbMV, BYMV | Pool      | 354                            | 168                                         | 110                                     | 6.94                                              |
| 11               | BYMV                   | Lentil    | 442                            | 134                                         | 79                                      | 14.4                                              |
| 12               | CMV, PEBV, PSbMV, BYMV | Pool      | 354                            | 168                                         | 39.7                                    | 12.6                                              |
| 10 <sup>-2</sup> | CMV, PEBV, PSbMV, BYMV | Pool      | 354                            | 9.6                                         | 16.9                                    | 54/pg/μL                                          |
| 10 <sup>-4</sup> | CMV, PEBV, PSbMV, BYMV | Pool      | 354                            | 7.6                                         | 8                                       | 10pg/μL                                           |
| 10 <sup>-6</sup> | CMV, PEBV, PSbMV, BYMV | Pool      | 354                            | 6.4                                         | 8                                       | 10pg/μL                                           |
| 10 <sup>-8</sup> | CMV, PEBV, PSbMV, BYMV | Pool      | 354                            | 4.3                                         | 7                                       | 10pg/μL                                           |

*Pea early browning virus (PEBV), Cumber mosaic virus (CMV), Bean yellow mosaic virus (BYMV), Pea seed-borne mosaic virus (PSbM)*

**Supplementary Table S2.** Summary of RNA-Seq paired-end data of the four samples LY-2=Genome sequence of PEBV as reported Maina et al.2020a, 14BY= BYMV infected sequenced sample as reported in Maina et al. 2020b, 13C and 14C= new PSbMV and CMV sequences generated from this study. Percentage of viral reads= Number of reads that mapped back to the viral genome of interest.

| Sample | Host      | Raw Reads | No. of Reads After QC | Percentage of Viral Reads | De Novo Assembly Contigs |
|--------|-----------|-----------|-----------------------|---------------------------|--------------------------|
| 13C    | Faba bean | 4,829,138 | 4,814,173             | 70.31%                    | 101                      |
| 14BY   | Lentil    | 3,588,734 | 3,541,904             | 55.15%                    | 12,171                   |
| LY-2   | Faba bean | 6,263,484 | 6,080,125             | 23.76%                    | 244                      |
| 14C    | Field pea | 5,425,232 | 5,354,502             | 9.35%                     | 10,396                   |

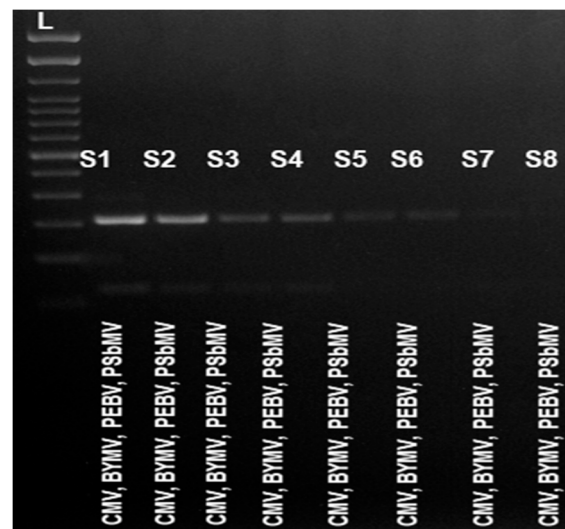

**Supplementary Figure S1.** Agarose GE from a mPCR of the four viruses (BYMV, PSbMV, CMV and PEBV) replicated ( $2 \times 4$ ) reactions. The aliquot from this viral cDNA pool was used as a template in a 100-fold serial dilution (S1,S2 =  $10^{-2}$ , S3,S4 =  $10^{-4}$ , S5,S6 =  $10^{-6}$ , S7,S8 =  $10^{-8}$ ) infected viral RNA pooled together from (BYMV, PSbMV, CMV and PEBV) infected samples amplified using HcPro-1F/HcPro-1FR,PCP-F1/ PCP-F1R,CMVRNA1F/CMVRNA1R,201K-F/201K-R primers, L = Invitrogen ready to use 1 kb Plus DNA ladder.
